# Supplementary material for: A Birth Cohort Study on the Genetic Modification of the Association of Prenatal Methylmercury With Child Cognitive Development
Source: PubMed Central journal article supplement — Am J Epidemiol. 2019 Jun 26;188(10):1784–93. doi: 10.1093/aje/kwz156 (PMC6768817; doi:10.1093/aje/kwz156), 2019-06-26

## **Web Material**

### **A Birth Cohort Study About the Genetic Modification of the Association of Prenatal Methylmercury With Child Cognitive Development**

Jordi Julvez, George Davey Smith, Susan Ring, and Philippe Grandjean

**Web Table 1**

**Web Table 2**

**Web Table 3**

**Web Table 4**

**Web Table 5**

**Web Figure 1**

**Web Table 1:** Characteristics of the Selected Confounders by Cord Hg Exposure and Child 8-year-old Total IQ (WISC-III) in a Sub-sample (combined group) of the ALSPAC Cohort (1991-2000).

| <b>Confounders of interest</b>                                    | <b>No.</b> | <b>Cord Hg Slices (ng/g)<br/>Median (IQR)</b> | <b>Total IQ<sup>c</sup><br/>Mean (SD)</b> |
|-------------------------------------------------------------------|------------|-----------------------------------------------|-------------------------------------------|
| Sex                                                               |            |                                               |                                           |
| Boy                                                               | 1161       | 23 (17-31)                                    | 105 (17)                                  |
| Girl                                                              | 1121       | 22 (17-30)                                    | 104 (15)                                  |
| Maternal Age                                                      |            |                                               |                                           |
| <30 years                                                         | 1216       | 21 (16-28) <sup>b</sup>                       | 103 (16) <sup>b</sup>                     |
| 30 years and older                                                | 1054       | 24 (18-33) <sup>b</sup>                       | 107 (16) <sup>b</sup>                     |
| Maternal education <sup>a</sup>                                   |            |                                               |                                           |
| Low                                                               | 453        | 20 (15-26) <sup>b</sup>                       | 96 (14) <sup>b</sup>                      |
| Middle                                                            | 779        | 21 (17-29) <sup>b</sup>                       | 103 (15) <sup>b</sup>                     |
| High                                                              | 981        | 26 (19-34) <sup>b</sup>                       | 111 (16) <sup>b</sup>                     |
| Maternal Social Class                                             |            |                                               |                                           |
| I-II                                                              | 824        | 26 (19-33) <sup>b</sup>                       | 111 (15) <sup>b</sup>                     |
| III (non-manual)                                                  | 805        | 21 (17-29) <sup>b</sup>                       | 103 (15) <sup>b</sup>                     |
| III (manual) IV & V                                               | 281        | 20 (15-27) <sup>b</sup>                       | 98 (15) <sup>b</sup>                      |
| Housing                                                           |            |                                               |                                           |
| Mortgaged/owned                                                   | 1896       | 23 (17-31) <sup>b</sup>                       | 106 (16) <sup>b</sup>                     |
| Council                                                           | 153        | 19 (15-24) <sup>b</sup>                       | 94 (15) <sup>b</sup>                      |
| Other                                                             | 169        | 20 (16-28) <sup>b</sup>                       | 102 (16) <sup>b</sup>                     |
| Parity                                                            |            |                                               |                                           |
| 0                                                                 | 1054       | 23 (17-32) <sup>b</sup>                       | 106 (16) <sup>b</sup>                     |
| 1                                                                 | 762        | 22 (17-30) <sup>b</sup>                       | 105 (16) <sup>b</sup>                     |
| 2+                                                                | 392        | 21 (16-29) <sup>b</sup>                       | 101 (16) <sup>b</sup>                     |
| Smoking during pregnancy                                          |            |                                               |                                           |
| No                                                                | 1730       | 23 (17-31) <sup>b</sup>                       | 106 (16) <sup>b</sup>                     |
| Yes                                                               | 505        | 20 (16-28) <sup>b</sup>                       | 101 (16) <sup>b</sup>                     |
| Daily Omega-3 Fatty Acid Intake from seafood 32 Week of Pregnancy |            |                                               |                                           |
| Low (<0.05 g)                                                     | 543        | 17 (12-22) <sup>b</sup>                       | 102 (15) <sup>b</sup>                     |
| Moderate (≤0.12 g)                                                | 707        | 22 (17-29) <sup>b</sup>                       | 106 (16) <sup>b</sup>                     |
| High (>0.12 g)                                                    | 903        | 27 (21-36) <sup>b</sup>                       | 107 (16) <sup>b</sup>                     |
| Selenium during pregnancy                                         |            |                                               |                                           |

|                                         |     |                         |                       |
|-----------------------------------------|-----|-------------------------|-----------------------|
| ≤ 111 (ug/l)                            | 472 | 20 (15-27) <sup>b</sup> | 104 (16) <sup>b</sup> |
| 111 (ug/l)                              | 473 | 26 (19-34) <sup>b</sup> | 107 (16) <sup>b</sup> |
| <b>Lead during pregnancy</b>            |     |                         |                       |
| ≤ 3.5 (ug/l)                            | 469 | 22 (17-30)              | 105 (16)              |
| > 3.5 (ug/l)                            | 474 | 24 (17-31)              | 106 (16)              |
| <b>Vitamin D Total during pregnancy</b> |     |                         |                       |
| ≤ 64 (nmol/l)                           | 731 | 22 (17-30)              | 104 (16)              |
| > 64 (nmol/l)                           | 731 | 23 (17-31)              | 105 (16)              |
| <b>Cotinine during pregnancy</b>        |     |                         |                       |
| ≤ 27 (ng/ml)                            | 528 | 24 (18-32) <sup>b</sup> | 107 (16) <sup>b</sup> |
| > 27 (ng/ml)                            | 502 | 22 (16-30) <sup>b</sup> | 103 (16) <sup>b</sup> |

<sup>a</sup>Similar results for paternal education (data not shown). <sup>b</sup> p-value ≤ 0.05.

**Web Table 2.** Adjusted Regression Coefficients ( $\beta$ ) for  $\text{Log}_{10}$  (Cord-Hg concentration (ng/g)) as a Predictor of WISC-III Outcomes Stratified by Maternal Social Class (Joint Sample of ALSPAC, 1991-2000).

| WISC-III scores | Maternal social class                  |                                                  |                                                     | P-interaction |
|-----------------|----------------------------------------|--------------------------------------------------|-----------------------------------------------------|---------------|
|                 | I-II<br>$\beta$ (95 % CI)<br>(n = 797) | III (non-man.)<br>$\beta$ (95 % CI)<br>(n = 756) | III (man.) & IV-V<br>$\beta$ (95 % CI)<br>(n = 255) |               |
| Verbal IQ       | 2.7<br>(-3.1, 8.5)                     | 5.7<br>(-0.3, 11.7)                              | -1.4<br>(-12.8, 10.1)                               | 0.620         |
| Performance IQ  | -3.4<br>(-9.6, 2.8)                    | 7.7<br>(1.4, 13.9)                               | 4.7<br>(-8.2, 17.6)                                 | 0.014         |
| Total IQ        | 0.1<br>(-5.6, 5.7)                     | 7.2<br>(1.4, 13.0)                               | 1.7<br>(-9.5, 13.0)                                 | 0.196         |

All multivariable linear regression models adjusted for: Sex, age and examiner, parental education level, maternal age, smoking during pregnancy, parity, house ownership status and estimated omega-3 intake (from seafood to 'omega-3 intake').

**Web Table 3.** Adjusted Regression Coefficients ( $\beta$ ) for the Cord-Hg Concentration as Predictor of the 8-year WISC-III Outcomes in the Combined Group. Sensitivity Analyses with Maternal Selenium, Lead, Vitamin D and Cotinine Concentration during Pregnancy. Models corrected by IPW (ALSPAC, 1991-2000).

| WISC-III scores                      | Estimate ( $\beta$ ) and 95% CI for Log <sub>10</sub><br>(Cord-Hg (ng/g)) |                                                     |
|--------------------------------------|---------------------------------------------------------------------------|-----------------------------------------------------|
|                                      | Completed Case<br>$\beta$ (95 % CI)                                       | IPW<br>Correction <sup>f</sup><br>$\beta$ (95 % CI) |
|                                      | <b>Model 2<sup>b</sup></b>                                                | <b>Model 2<sup>b</sup></b>                          |
| Selenium (Median = 111 ug/l)         | n = 760                                                                   | n = 760                                             |
| Total IQ                             | -0.3 (-6.2, 5.6)                                                          | -0.2 (-5.7, 5.2)                                    |
| Verbal IQ                            | 0.1 (-6.1, 6.1)                                                           | -0.1 (-6.0, 5.9)                                    |
| Performance IQ                       | -1.1 (-7.7, 5.5)                                                          | -0.8 (-7.1, 5.3)                                    |
|                                      | <b>Model 3<sup>c</sup></b>                                                | <b>Model 3<sup>c</sup></b>                          |
| Lead (Median = 3 ug/l)               | n = 758                                                                   | n = 758                                             |
| Total IQ                             | -1.0 (-6.8, 4.9)                                                          | -0.9 (-6.4, 4.6)                                    |
| Verbal IQ                            | -1.1 (-7.1, 4.9)                                                          | -1.1 (-7.1, 4.9)                                    |
| Performance IQ                       | -0.9 (-7.4, 5.6)                                                          | -0.8 (-7.0, 5.4)                                    |
|                                      | <b>Model 4<sup>d</sup></b>                                                | <b>Model 4<sup>d</sup></b>                          |
| Vitamin D Total (Median = 64 nmol/l) | n = 1178                                                                  | n = 1178                                            |
| Total IQ                             | 1.0 (-3.7, 5.6)                                                           | 0.7 (-3.9, 5.3)                                     |
| Verbal IQ                            | 1.4 (-3.3, 6.1)                                                           | 1.0 (-3.9, 5.9)                                     |
| Performance IQ                       | 0.5 (-4.6, 5.6)                                                           | 0.4 (-4.6, 5.4)                                     |
|                                      | <b>Model 5<sup>e</sup></b>                                                | <b>Model 5<sup>e</sup></b>                          |
| Cotinine (Median = 27 ng/ml)         | n = 830                                                                   | n = 830                                             |
| Total IQ                             | -1.5 (-7.0, 4.0)                                                          | -1.7 (-7.4, 4.0)                                    |
| Verbal IQ                            | -1.9 (-7.6, 3.8)                                                          | -1.5 (-7.6, 4.5)                                    |
| Performance IQ                       | -0.7 (-7.0, 5.6)                                                          | -1.3 (-7.7, 5.1)                                    |

<sup>a</sup>Basic Model: Adjusted for sex, age, examiner, parental education level, maternal age, smoking during pregnancy (except for cotinine models), social class, parity, house ownership status, estimated omega-3 intake (from seafood' to 'omega-3 intake'). <sup>b</sup>Additionally adjusted for maternal selenium blood concentration during pregnancy. <sup>c</sup>Additionally adjusted for maternal lead blood concentration during pregnancy. <sup>d</sup>Additionally adjusted for maternal total vitamin D blood concentration during pregnancy. <sup>e</sup>Additionally adjusted for maternal cotinine urine concentration during pregnancy. <sup>f</sup>Coefficients estimated using IPW. Weights = inverse of the probability of being a complete case. Predicted probabilities were estimated by using logistic regression with age, parental education level, maternal smoking during pregnancy, social class, parity and house ownership status, estimated omega-3 intake (from seafood' to 'omega-3 intake') as predictors of missingness.

**Web Table 4.** Adjusted Regression Coefficients ( $\beta$ ) for the Cord-Hg Concentration (ng/g) as Predictor of WISC-III Total IQ by Selected Genotypes (Joint Sample of ALSPAC corrected by IPW<sup>b</sup>; 1991-2000).

| WISC-III scores<br>Joint Sample                           | n    | Log <sub>10</sub> (Cord Hg Slices (ng/g)) |             |               |
|-----------------------------------------------------------|------|-------------------------------------------|-------------|---------------|
|                                                           |      | Estimate ( $\beta$ ) <sup>b</sup>         | 95 % CI     | P-interaction |
| <b>Total IQ</b>                                           | 1723 |                                           |             |               |
| <b>Pilot Study SNPs (Re-Tested with the Joint Sample)</b> |      |                                           |             |               |
| rs3811647 ( <i>TF</i> ) 11                                | 760  | 5.9                                       | 0.3, 11.5   |               |
| rs3811647 ( <i>TF</i> ) 12                                | 768  | 0.7                                       | -5.5, 7.0   | 0.683         |
| rs3811647 ( <i>TF</i> ) 22                                | 195  | 0.7                                       | -10.2, 11.6 |               |
| rs662 ( <i>PONI</i> ) 11                                  | 898  | 7.6                                       | 1.8, 13.4   |               |
| rs662 ( <i>PONI</i> ) 12+22 <sup>a</sup>                  | 825  | -2.5                                      | -7.8, 2.8   | 0.056         |
| rs1042838 ( <i>PGR</i> ) 11                               | 1197 | 7.1                                       | 2.5, 11.6   |               |
| rs1042838 ( <i>PGR</i> ) 12+22 <sup>a</sup>               | 526  | -7.6                                      | -15.0, -0.2 | 0.001         |
| rs2049046 ( <i>BDNF</i> ) 11                              | 514  | 4.3                                       | -3.4, 12.0  |               |
| rs2049046 ( <i>BDNF</i> ) 12                              | 854  | 3.2                                       | -2.2, 8.7   | 0.999         |
| rs2049046 ( <i>BDNF</i> ) 22                              | 355  | 1.3                                       | -6.6, 9.1   |               |
| <b>New SNPs (Discovery from Joint Sample Analyses)</b>    |      |                                           |             |               |
| rs5746136 ( <i>SOD2</i> ) 11                              | 797  | 0.4                                       | -5.2, 6.0   |               |
| rs5746136 ( <i>SOD2</i> ) 12+22 <sup>a</sup>              | 926  | 5.6                                       | 0.1, 11.0   | 0.057         |
| rs4149268 ( <i>ABCA1</i> )11                              | 695  | -4.6                                      | -10.7, 1.4  |               |
| rs4149268 ( <i>ABCA1</i> )12                              | 764  | 6.1                                       | 0.2, 11.9   | 0.043         |
| rs4149268 ( <i>ABCA1</i> )22                              | 264  | 9.4                                       | -2.4, 21.1  |               |
| rs3890182 ( <i>ABCA1</i> )11                              | 1257 | 0.8                                       | -3.6, 5.3   |               |
| rs3890182 ( <i>ABCA1</i> )12+22 <sup>a</sup>              | 466  | 8.6                                       | 0.2, 17.0   | 0.043         |
| rs2270836 ( <i>MTIM</i> )11                               | 645  | -1.8                                      | -8.4, 4.7   |               |
| rs2270836 ( <i>MTIM</i> )12                               | 777  | 5.3                                       | -0.3, 10.8  |               |
| rs2270836 ( <i>MTIM</i> )22                               | 281  | 10.3                                      | -0.2, 20.8  | 0.048         |

*TF* (Transferrin); *PONI* (Paraoxonase 1); *BDNF* (Brain-Derived Neurotrophic Factor); *PGR* (Progesterone Receptor); *SOD2* (superoxide dismutase 2); *ABCA1* (ATP binding cassette subfamily A member 1); *MTIM* (metallothionein 1M). All multivariable linear regression models adjusted for: Sex, age and examiner, parental education level, maternal age, smoking during pregnancy, social class, parity and house ownership status, estimated omega-3 intake (from seafood' to 'omega-3 intake'). <sup>a</sup>The alleles 12 and 22 were combined into a unique category due to low number of observations (22 alleles < 10 % of the total sample). <sup>b</sup>Coefficients estimated using IPW. Weights = inverse of the probability of being a complete case. Predicted probabilities were estimated by using logistic regression with age, parental education level, maternal smoking during pregnancy, social class, parity and house ownership status, estimated omega-3 intake (from seafood' to 'omega-3 intake') as predictors of missingness.

**Web Table 5.** Adjusted Regression Coefficients ( $\beta$ ) for the Cord-Hg Concentration as Predictor of the 8-year WISC-III Outcomes in the Combined Group, General and by *PGR* rs1042838 variants. Main Models and Additional Adjustments for Maternal Healthy Diet Score and Child Processed Diet Score (ALSPAC, 1991-2000).

| WISC-III scores                                                     | Umbilical Cord Mercury                       |                                                               |
|---------------------------------------------------------------------|----------------------------------------------|---------------------------------------------------------------|
|                                                                     | Main Model <sup>a</sup><br>$\beta$ (95 % CI) | Additional Adjustment Model <sup>b</sup><br>$\beta$ (95 % CI) |
| <b>Joint sample</b>                                                 |                                              |                                                               |
| Total IQ (n = 1564)                                                 | 1.4 (-2.5, 5.3)                              | 1.2 (-2.7, 5.1)                                               |
| Total IQ by rs1042838 ( <i>PGR</i> ) 11 (n = 1034)                  | 5.4 (0.5, 10.4)                              | 5.2 (0.3, 10.2)                                               |
| Total IQ by rs1042838 ( <i>PGR</i> ) 12 + 22 <sup>c</sup> (n = 458) | -7.6 (-15.1, -0.1)                           | -7.5 (-14.9, -0.1)                                            |
| p-for-interaction                                                   | 0.001                                        | 0.001                                                         |

<sup>a</sup> Multivariable linear regression models adjusted for: Sex, age and examiner, parental education level, maternal age, smoking during pregnancy, social class, parity, house ownership status and estimated omega-3 intake (from seafood' to 'omega-3 intake').

<sup>b</sup> Multivariable linear regression models additionally adjusted for maternal healthy diet score during pregnancy and child processed diet score.

<sup>c</sup> The alleles 12 and 22 were combined into a unique category due to low number of observations (22 alleles < 10 % of the total sample).

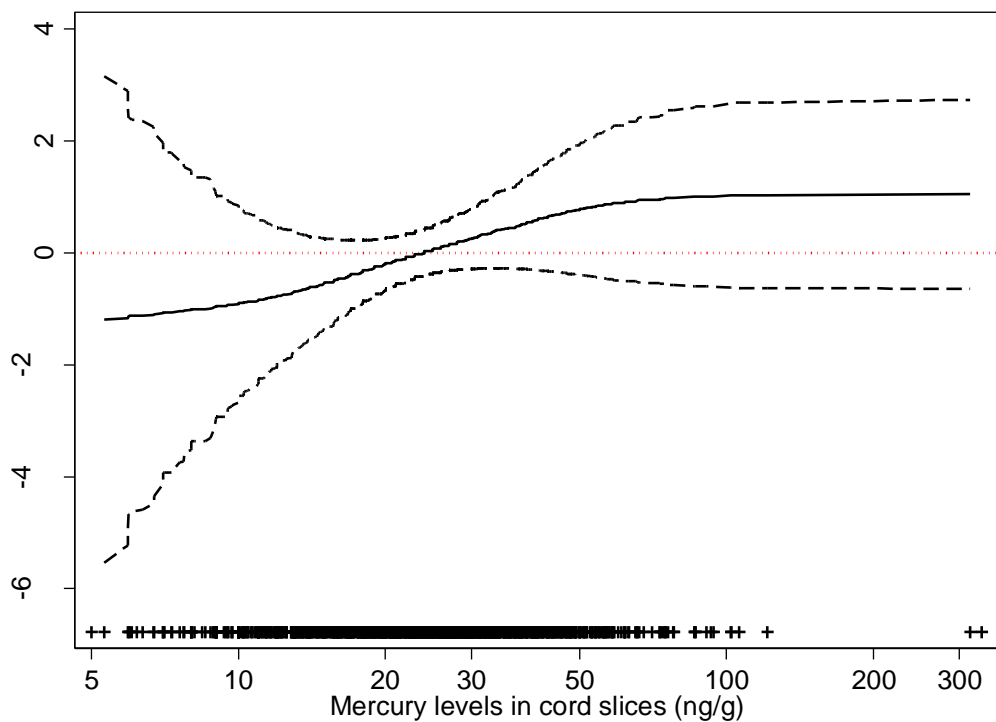

**Web Figure 1.** GAM plot for WISC-III Total IQ showing the association with Mercury levels in Cord slices. Dash lines are 95% CI. Tick marks on the x-axis display de distribution of observed Hg concentrations. Analysis adjusted by sex, age and examiner, parental education level, maternal age, smoking during pregnancy, social class, parity and house ownership status, estimated omega-3 intake (from seafood' to 'omega-3 intake'). The alleles 12 and 22 were combined into a unique category due to low number of observations (22 alleles < 10 % of the total sample). ALSPAC, 1991-2000.

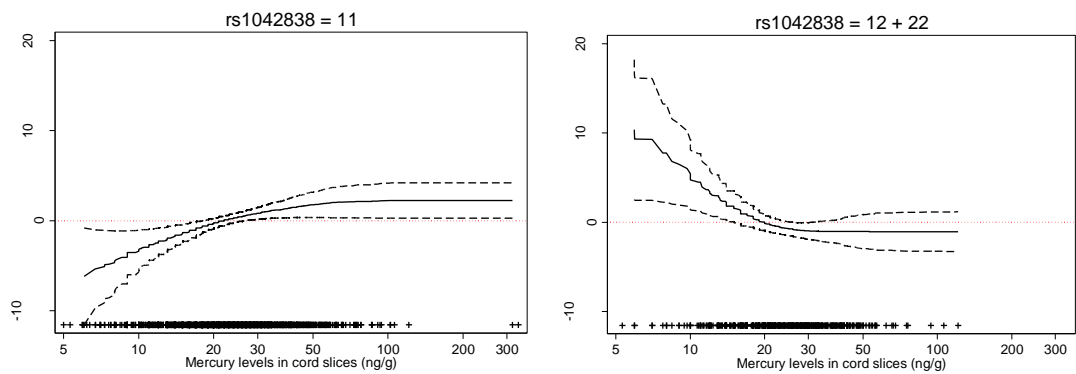

Supplement: kwz156_julvez_web_material_final.pdf [file kwz156_julvez_web_material_final.pdf]
